# Supplementary material
Source: PubMed Central journal article supplement (PMC5436547)
Supplement: jciinsight-2-93098-s001.pdf [file jciinsight-2-93098-s001.pdf]

## **Insulin supplementation attenuates cancer-induced cardiomyopathy and slows tumor disease progression**

**Authors:** James T Thackeray<sup>§1</sup>, Stefan Pietzsch<sup>§2</sup>, Britta Stapel<sup>§2</sup>, Melanie Ricke-Hoch<sup>2</sup>, Jens P Bankstahl<sup>1</sup>, Michaela Scherr<sup>3</sup>, Jörg Heineke<sup>2</sup>, Gesine Scharf<sup>2</sup>, Arash Haghikia<sup>2</sup>, Frank M Bengel<sup>#1</sup>, Denise Hilfiker-Kleiner<sup>\*#2</sup>

§equally contributing first authors

#equally contributing last authors

<sup>1</sup>Department of Nuclear Medicine.

<sup>2</sup>Division of Molecular Cardiology, Department of Cardiology and Angiology.

<sup>3</sup>Department of Hematology, Hemostasis, Oncology and Stem Cell Transplantation.

Hannover Medical School

Hannover, Germany

\*Corresponding author:

Denise Hilfiker-Kleiner, PhD

Abt. Kardiologie und Angiologie

Medizinische Hochschule Hannover

Carl-Neuberg Str. 1

30625 Hannover, Germany

phone/fax: +49(511)532-2531/-3263

email: hilfiker.denise@mh-hannover.de

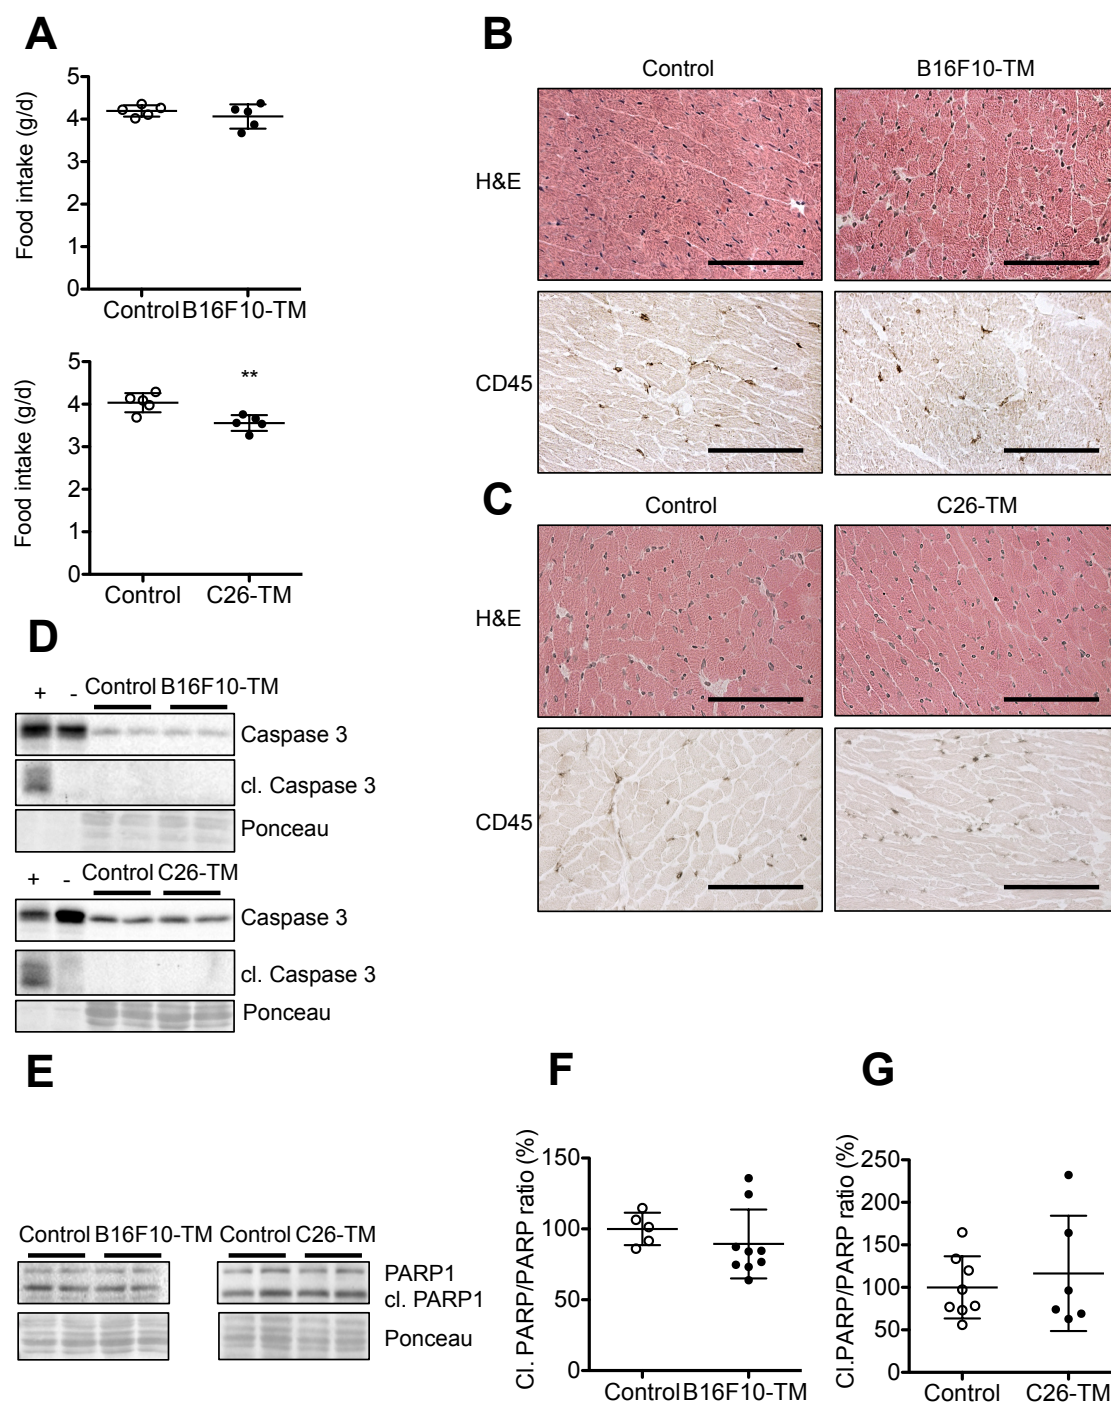

**Figure S1.** (A) Food intake (g/d) in B16F10-TM and C26-TM over experimental duration versus strain-matched healthy controls (n=5 each); (B, C) H&E staining (upper panel) and CD45 immunohistochemistry with eosin co-staining (lower panel) in B16F10-TM (n=8 vs n=9 controls) and C26-TM (n=9 vs n=9 controls for H&E, n=4 vs n=4 controls for CD45) with advanced cancer compared to respective healthy controls. Scale bars indicate 100  $\mu$ m. (D) Western blots of Caspase 3 and cleaved Caspase 3 in B16F10-TM (n=7, controls n=5) and C26-TM (n=6, controls n=6) with advanced cancer compared to healthy controls. Jurkat cell lysates with (+) or without (-) cytochrome c treatment served as positive and negative controls for cleaved Caspase 3. (E) Western blots of PARP1 and cleaved PARP1 protein in LV lysates from B16F10-TM and C26-TM, both with advanced disease stage and respective healthy controls and (F, G) quantification of cleaved PARP/PARP protein ratio from B16F10-TM (n=9 vs control, n=5) and C26-TM (n=8 vs control, n=8). Data are depicted as

## Supplemental material and results

mean $\pm$ SD; \*\*P<0.01 to respective healthy controls, using two-tailed Student's unpaired t-tests.

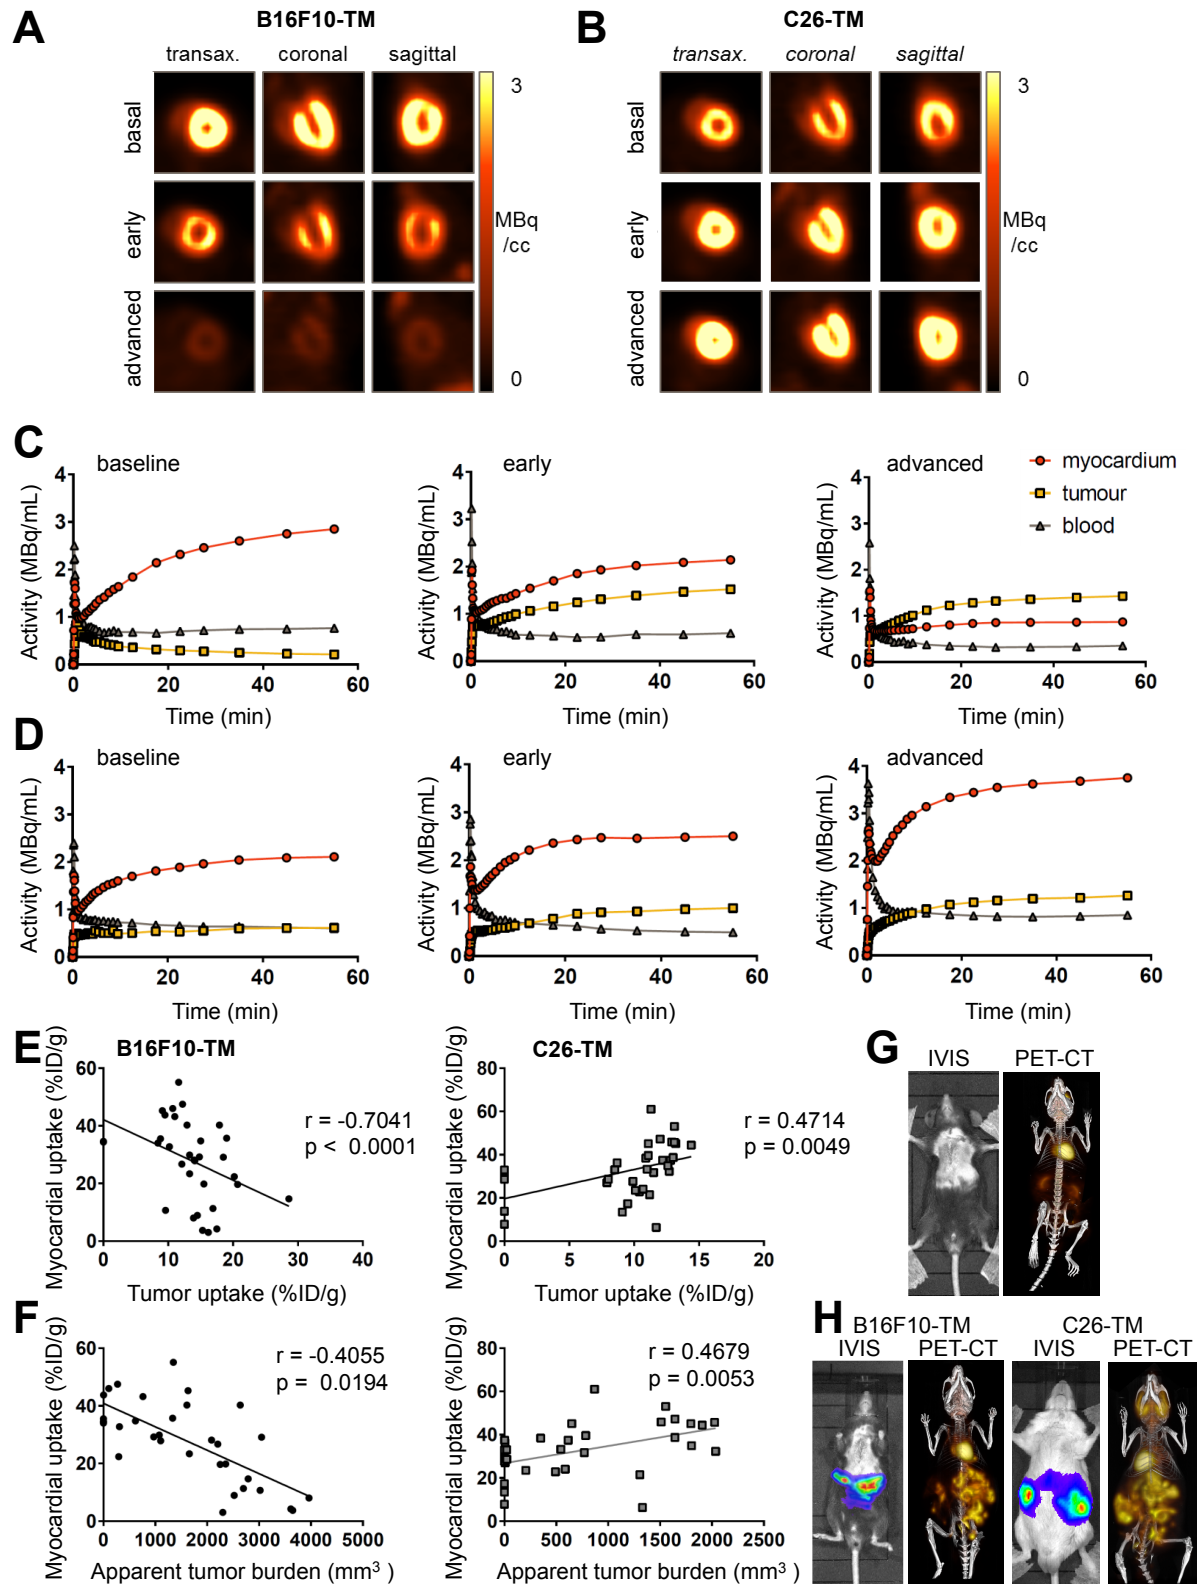

**Figure S2.** Representative transaxial, coronal and sagittal cardiac  $^{18}\text{F}$ -FDG images at serial time points in (A) B16F10-TM and (B) C26-TM mice with advanced tumor disease. Mean  $^{18}\text{F}$ -FDG time-activity curves over 60 min dynamic scan for myocardium, tumor and blood pool for (C) B16F10-TM ( $n=13$ ) and (D) C26-TM mice ( $n=13$ ). (E)  $^{18}\text{F}$ -FDG uptake (%ID/g) in myocardium with  $^{18}\text{F}$ -FDG uptake in tumor shows a negative correlation for B16F10-TM ( $r=-0.7041$ ,  $P<0.0001$ ) and a positive correlation for C26-TM mice ( $r=0.4714$ ,  $P=0.0049$ ). (F)

## Supplemental material and results

Correlation of  $^{18}\text{F}$ -FDG uptake in myocardium with  $^{18}\text{F}$ -FDG-avid apparent tumor burden shows a similar negative correlation in B16F10-TM ( $r=-0.4055$ ,  $P=0.0194$ ) and positive correlation in C26-TM mice ( $r=0.4679$ ,  $P=0.0053$ ). Pearson product-moment correlation coefficients are calculated from aggregate comparison over the full time course for both tumor models. **(G, H)** Comparison of  $^{18}\text{F}$ -FDG-PET-CT scan and bioimaging with IVIS before (G (C57Bl6)) and after (H) tumor implantation (in both models) with growing tumor mass on consecutive days.

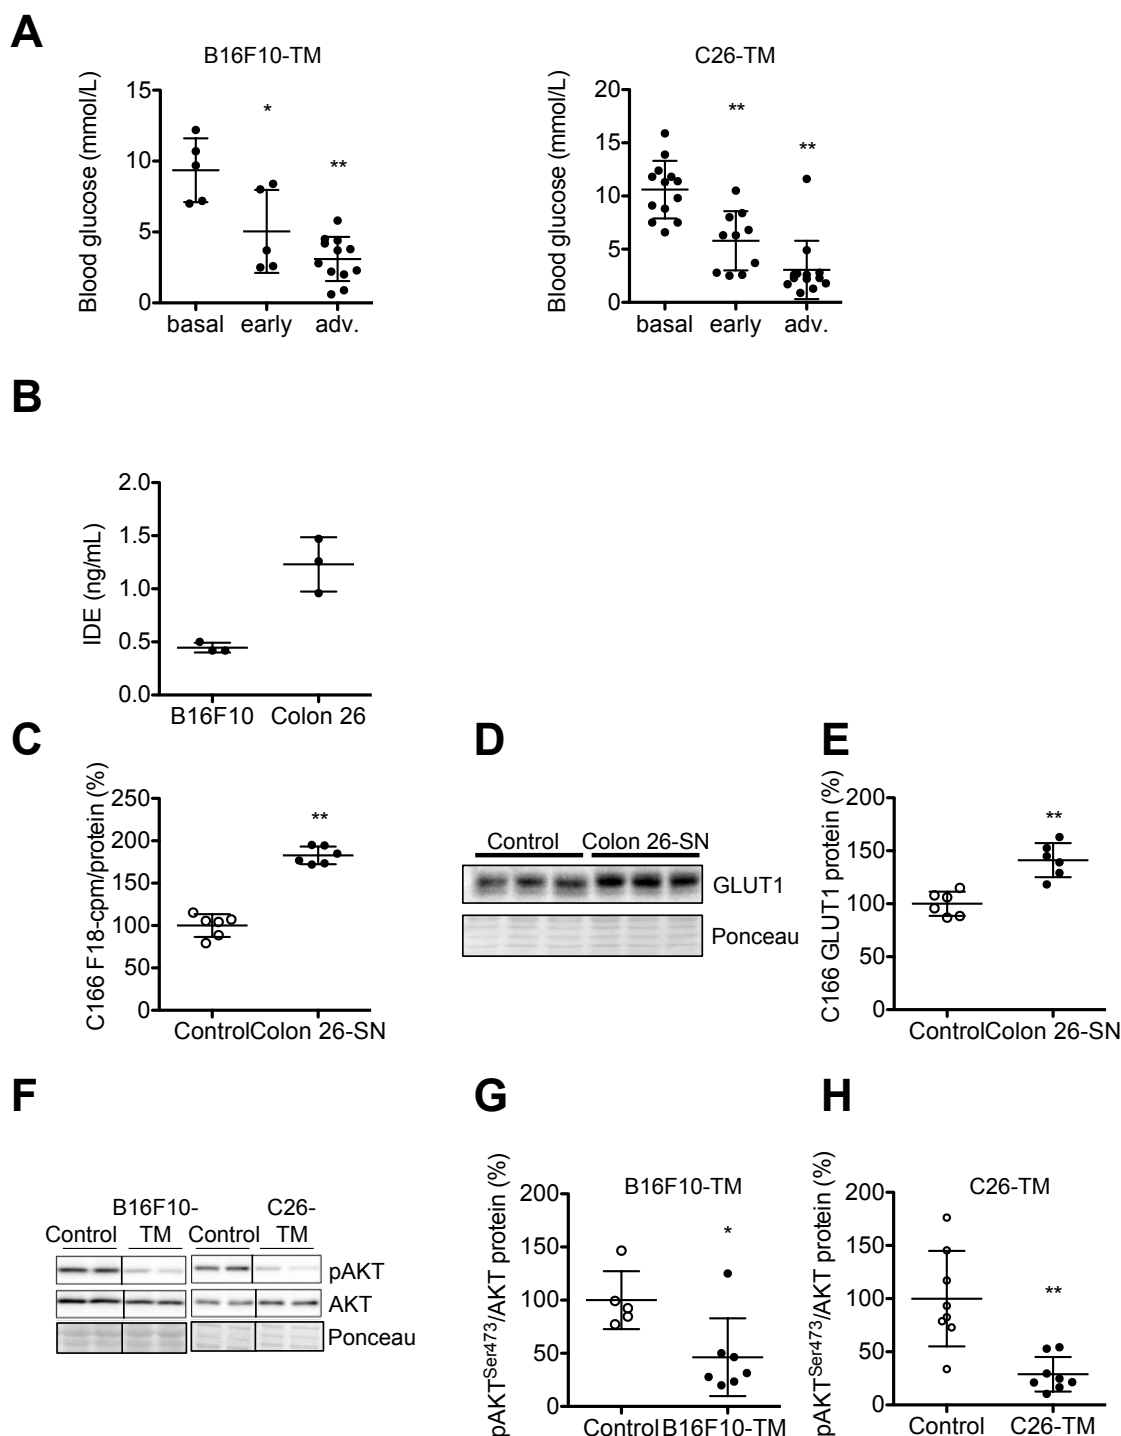

**Figure S3.** (A) Post- $^{18}\text{F}$ -FDG scan blood glucose levels from B16F10-TM (n=5-12) and C26-TM (n=10-13) before tumor inoculation (basal), and at early (7 days) and advanced (14-21 days) disease stages. (B) Relative insulin degrading enzyme (IDE) levels in cell culture supernatants from C26 and B16F10 cells after serum-free in vitro culture for 24 h (means $\pm$ SD, n=3 culture dishes per cell line were analyzed). (C)  $^{18}\text{F}$ -FDG uptake of C166 cells treated with supernatants derived from Colon 26 cells (Colon 26-SN) or respective control medium (n=6 samples per group, derived from into 2 individual experiments). (D) Western blots of protein lysates from C166 cells treated with supernatants derived from Colon 26 cells (Colon 26-SN) or respective control medium (Control) for 24h showing GLUT1 expression and PonceauS as loading control. (E) Quantification of GLUT1 protein expression of C166 cells treated with supernatants derived from Colon 26 cells (Colon 26-SN) or

## Supplemental material and results

respective control medium (Control) for 24h (n=6 samples per group, derived from into 2 individual experiments). **(F)** Western blots showing total Akt and phosphorylation at Ser473 (pAkt) in LVs of B16F10-TM and C26-TM with Ponceau S as loading control. Samples were noncontiguous and cut for presentation as indicated. **(G, H)** Graphs with ratio of pAkt<sup>S473</sup>/Akt in B16F10-TM (n=7) or C26-TM (n=8) with advanced disease and respective controls (n=5-8) Data are mean±SD. \*P<0.05, \*\*P<0.01 vs basal or respective control using two-tailed Student's unpaired t-tests or using one-way ANOVA with Bonferroni post hoc tests.

**Table S1. Clinical data from patients and healthy controls**

|                |                      | Tumor patients      | Controls     |
|----------------|----------------------|---------------------|--------------|
| N              |                      | 14                  | 13           |
| Age            | years                | 59.05 (51.48-69.23) | 56 (54-61.5) |
| Sex            | male<br>%            | 50                  | 77           |
| BMI            | [kg/m <sup>2</sup> ] | 21.7 (19.63-22.63)  | N/A          |
| weight<br>loss | [kg]                 | 9 (5-18.5)          | N/A          |

Data are presented as the percentage or the median (25<sup>th</sup>-75<sup>th</sup> percentile). Weight loss is indicated over a period of 12 months. BMI = Body Mass Index. N/A = not available.

**Etiology of cancer in these patients:** Hepatocellular (36%), Colo-rectal (29%), Gastric (14%), Oesophagal (14%), other (7%). Only tumor patients with a body weight loss >5% within the last 12 months before sample collection were included.

**Table S2. Primers**

| mRNA            | Sense primers (5' to 3' ) | Antisense primers (5' to 3' ) |
|-----------------|---------------------------|-------------------------------|
| <i>18S rRNA</i> | GTAACCCGTTGAACCCCAT       | CCATCCAATCGGTAGTAGCG          |
| <i>ANP</i>      | GCCGGTAGAAGATGAGGTCA      | GGGCTCCAATCCTGTCAATC          |
| <i>Atrogin1</i> | CTTCTCGACTGCCATCCTGG      | GTTCTTTTGGGCGATGCCAC          |
| <i>CatL</i>     | CCTATGAAGCGAAGGACGGA      | TTCACGACAGGATAGCTGGC          |
| <i>Irs-2</i>    | CCATCGATGTGAGAGGCGAG      | GGCGATGGGGCTGGTAG             |
| <i>LC3b</i>     | CATGCCGTCCGAGAAGACCT      | TCGCTCTATAATCACTGGGATCTTG     |
| <i>Myh6</i>     | GGAAGAGCGAGCGGCGCATCAAGG  | GTCTGCTGGAGAGGTTATTCCTCG      |
| <i>Myh7</i>     | CAAGTTCCGCAAGGTGC         | AAATTGCTTTATTCTGCTTCCAC       |
| <i>MuRF1</i>    | GAGGGCCATTGACTTTGGGA      | CCAGAGCGTGTCTCACTCAT          |
